# Supplementary material for: Toxicity of Pekinenin C from Euphorbia Pekinensis Radix on Rat Small Intestinal Crypt Epithelial Cell and Its Apoptotic Mechanism
Source: Int J Mol Sci. 2016 Jun 2;17(6):850. doi: 10.3390/ijms17060850 (PMC4926384; doi:10.3390/ijms17060850)
Supplement: Supplementary file 1 [file ijms-17-00850-s001.pdf]

# Supplementary Materials: Toxicity of Pekinenin C from Euphorbia Pekinensis Radix on Rat Small Intestinal Crypt Epithelial Cell and Its Apoptotic Mechanism

Yudan Cao, Fangfang Cheng, Weifeng Yao, Beihua Bao, Kaicheng Zhang, Li Zhang and Anwei Ding

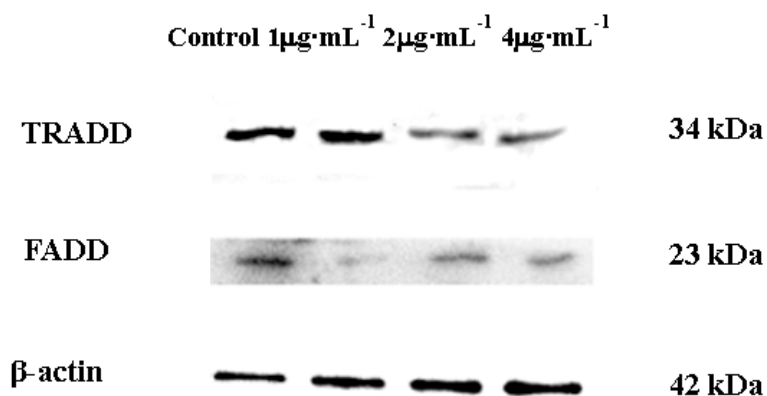

**Figure S1.** The expression of TRADD, FADD protein detected by western-blotting after treatment with pekinenin C (PC) for 48 h.
